# Supplementary material
Source: PubMed Central journal article supplement (PMC6048950)
Supplement: NIHMS977631-supplement-2.pdf [file NIHMS977631-supplement-2.pdf]

**Supplementary Table 1.** ICD-9 diagnosis codes for foot ulceration, diabetes, lower limb pathology categories, and outcomes (minor/major amputation).

| <b>Diagnosis/Procedure</b>  | <b>ICD-9 Diagnosis Codes</b>                                                                                                                                                                               |
|-----------------------------|------------------------------------------------------------------------------------------------------------------------------------------------------------------------------------------------------------|
| Foot Ulcer                  | 440.23, 707.14-5                                                                                                                                                                                           |
| Diabetes                    | 249.00-1, 249.10-1, 249.20-1, 249.30-1, 249.40-1, 249.50-1, 249.60-1, 249.70-1, 249.80-1, 249.90-1, 250.00-3, 250.20-3, 250.30-3, 250.40-3, 250.50-3, 250.60-3, 250.70-3, 250.80-3, 250.90-3, 648.0, 648.8 |
| Neuropathy                  | 250.60, 250.61, 250.62, 250.63, 337.00, 337.1, 337.9, 353.1, 355.0, 356.4, 356.9, 357.2, 357.4, 357.89, 536.3, 713.5,                                                                                      |
| Peripheral vascular disease | 440.20, 440.21, 440.22, 440.23, 440.29, 443.9,                                                                                                                                                             |
| Gangrene                    | 785.4, 040.0, 440.24                                                                                                                                                                                       |
| Infection                   | 681.1, 681.9, 682.6, 682.7, 682.9, 730.07, 730.17, 730.27, 99.21                                                                                                                                           |
| Major amputation            | 84.15, 84.16, 84.17, 84.18                                                                                                                                                                                 |
| Minor amputation            | 84.11, 84.12                                                                                                                                                                                               |
